# Supplementary material for: Horizontal and Vertical Migration of Anglerfish Lophius piscatorius in Relation to Hydrography in Faroese Waters
Source: Frontiers journal article supplement (doi:10.3389/fmars.2022.823066), 2022-03-04
Supplement: Data_Sheet_1.docx [file Data_Sheet_1.docx]

**Table S1.** Time of sunrise and sunset at 62°N, 7°W for the different periods. The sun angle was calculated using the solar position algorithm by Reda and Andreas (2004).

|  | Sunrise, early | Sunrise, late | Sunset, early | Sunset, late |
| --- | --- | --- | --- | --- |
| Nov-Feb | 07.15 | 10.00 | 15.00 | 17.15 |
| Mar-Apr | 04.00- | 07.00 | 17.30 | 20.00 |
| May-Aug | 02.30- | 05.00- | 19.30 | 21.30+ |
| Sept-Oct | 05.00- | 7.45 | 16.15 | 19.30 |

**Table S2.** Average bottom temperature registrations per 0.5°C of stations from the annual groundfish surveys on the Faroe Plateau in spring and summer (see Table 1). Kg/hour (sum of kg/ sum of stations (N) per temperature interval), stations with anglerfish in catch (N*) and total number of stations (N) given for various temperature intervals. In the annual groundfish surveys are the trawl time one hour on each station.

|  | Spring |  |  | Summer |  |  |
| --- | --- | --- | --- | --- | --- | --- |
| Temp. | kg/h | N* | N | kg/h | N* | N |
| 11-11.5 |  |  |  | 0.0 |  | 11 |
| 10.5-11 |  |  |  | 2.7 | 36 | 96 |
| 10-10.5 |  |  |  | 2.0 | 131 | 422 |
| 9.5-10 |  |  |  | 3.5 | 171 | 461 |
| 9-9.5 |  |  |  | 2.4 | 91 | 325 |
| 8.5-9 |  |  |  | 3.3 | 136 | 412 |
| 8-8.5 | 0.0 |  | 13 | 2.9 | 149 | 457 |
| 7.5-8 | 1.6 | 33 | 152 | 2.9 | 84 | 257 |
| 7-7.5 | 1.4 | 94 | 461 | 2.2 | 22 | 116 |
| 6.5-7 | 1.1 | 52 | 300 | 2.1 | 7 | 62 |
| 6-6.5 | 0.8 | 13 | 79 | 1.2 | 6 | 38 |
| 5.5-6 | 1.2 | 3 | 21 | 3.1 | 9 | 41 |
| 5-5.5 | 1.6 | 3 | 18 | 0.1 | 1 | 25 |
| 4.5-5 | 0.0 |  | 9 | 1.4 | 3 | 24 |
| 4-4.5 | 0.7 | 1 | 13 | 0.6 | 3 | 29 |
| 3.5-4 | 0.0 |  | 3 | 0.0 |  | 25 |
| 3-3.5 | 0.0 |  | 4 | 0.5 | 1 | 21 |
| 2.5-3 | 0.0 |  | 5 | 0.0 |  | 17 |
| 2-2.5 | 0.0 |  | 4 | 0.0 |  | 16 |
| 1.5-2 | 0.0 |  | 3 | 0.0 |  | 10 |
| 1-1.5 | 0.0 |  | 1 | 0.0 |  | 21 |
| 0.5-1 |  |  |  | 0.0 |  | 11 |
| 0-0.5 |  |  |  | 0.0 |  | 8 |
| -0.5-0 |  |  |  | 0.0 |  | 19 |
| Total | 1.2 | 199 | 1086 | 2.6 | 850 | 2924 |
